## Floristics of the Dunbar Valley serpentinite site, Songimvelo Game Reserve, South Africa

KUNDA CHANGWE and KEVIN BALKWILL\*

*C.E. Moss Herbarium, Department of Animal, Plant and Environmental Sciences, University of the Witwatersrand, Private Bag 3, WITS, 2050, Republic of South Africa*

Received August 2001; accepted for publication July 2003

The Dunbar Valley serpentinite outcrop has a flora comprising 254 taxa (species and below) in 172 genera and 63 families. Dunbar Valley has more species than other studied serpentinite sites in the Barberton Greenstone Belt (BGB). The genus *Senecio* is the most speciose genus in the BGB. The level of species endemism at Dunbar Valley is 2.0%. Most of the serpentinite endemics in the BGB show phytogeographical affinities with the Sudano-Zambezian Region. Six modified-Whittaker plots, three on serpentinite and three on non-serpentinite soils, were sampled. Sørensen's index was 0.312, indicating low similarity in species between serpentinite and non-serpentinite sites ( $\beta$ -diversity) at Dunbar Valley, as at other sites in the BGB.  $\alpha$ -diversity (using the Shannon–Wiener index) for the serpentinite was  $2.631 \pm 0.901$  and for the non-serpentinite,  $2.886 \pm 0.130$ . However, a Student's *t*-test showed no significant difference in  $\alpha$ -diversity between the two habitats. There was also no significant difference in species richness between serpentinite and non-serpentinite sites. Total species showed negative correlations with total nickel, altitude and serpentinite outcrop size (area) for six sites in the BGB. Number of endemic taxa showed no correlation with environmental variables. © 2003 The Linnean Society of London, *Botanical Journal of the Linnean Society*, 2003, 143, 271–285.

ADDITIONAL KEYWORDS: checklist of flora – endemism – phytogeography – species diversity.

### INTRODUCTION

The term serpentinite, in its narrowest sense, is applied to the minerals antigorite and chrysolite that have the general formula  $Mg_3Si_2O_5(OH)_4$  and are derived from ultramafic rocks (Brooks, 1987). Ultramafic rocks occupy less than 1% of the land surface of the earth and are found on all the continents, bearing important minerals such as nickel, chromium and cobalt amongst others. Rocks that are rich in serpentine minerals derived from the alteration of previously existing olivines and pyroxenes are known as serpentinites (Brooks, 1987).

Soils derived from serpentinite rocks vary from one site to another as the type of soil produced during the weathering process depends on factors such as the nature of the parent material, climate, relief, time, and biological activity (Brooks, 1987). Generally, ser-

pentinite soils have a high concentration of nickel, chromium, cobalt, and iron; a high magnesium-to-calcium ratio; and a low concentration of soil nutrients such as nitrogen, phosphorus, and potassium (Brooks, 1987; Balkwill *et al.*, 1997). These conditions have considerable effect on the vegetation growing in these soils, resulting in serpentinite sites supporting a very unusual and specialized flora consisting of species that have evolved some degree of resistance to heavy metals (Williamson, Robinson & Balkwill, 1997). Therefore, serpentinite sites are expected to have low diversity (Kruckeberg, 1954).

There is usually some contrast between the serpentinite flora and the nearby non-serpentinite sites (Brooks, 1987). In addition, a number of taxa that are endemic to the serpentinite soils usually occur. However, the existence of endemics with restricted distributions depends largely on the availability of suitable habitats as the individual populations of the serpentinite endemics are usually small and vulnerable to local disturbances (Brooks, 1987). Although serpen-

\*Corresponding author. E-mail: kevinb@gecko.biol.wits.ac.za

tinite sites are considered important as reservoirs of rare and endemic species and have untapped potential for contributing to the understanding of evolutionary science, the sites are neglected areas of research and many have not been described biologically; additionally, many are under threat because of not being formally conserved (Proctor & Nagy, 1992; Balkwill *et al.*, 1997).

In South Africa, major outcrops of serpentinite are found in two regions, namely the Greenstone Belt of the Barberton Mountainland in Mpumalanga and a band from Potgietersrus to Duiwelskloof in the Northern Province. In addition, smaller outcrops of serpentinite also occur on the Witwatersrand (Gauteng) and in KwaZulu-Natal. There are 36 serpentinite sites in Mpumalanga, 30 of which have been mapped by geologists and six small sites are considered to be serpentinitiferous as a result of the presence of the nickel hyperaccumulators *Berkheya coddii* Roessler and/or *B. rehmannii* Thell. var. *rogersiana* Thell. Balkwill *et al.* (1997) give a list of serpentinite sites in southern Mpumalanga with their approximate sizes (area), range of altitudes and the veld types in which they occur.

So far serpentinite studies in South Africa have concentrated mainly on the sites in the Barberton Greenstone Belt (BGB). These sites have shown considerable diversity in physical features and soil chemical properties (Morrey, Balkwill & Balkwill, 1989; Balkwill *et al.*, 1997). More than 1000 taxa at species level and below, including 31 endemics, have been recorded on serpentinite sites in the BGB and are considered serpentinite-tolerant. However, the conservation status of most of the endemics has not been assessed and most would be classified as either rare or endangered based on the new International Union for the Conservation of Nature categories (Hilton-Taylor, 1997).

The main objectives of this study were: (a) to identify previously unidentified material from the Dunbar Valley serpentinite site that had been collected and housed in the C. E. Moss Herbarium, University of the Witwatersrand and to update and analyse a checklist of flora of the site; (b) to determine species richness and diversity of the Dunbar Valley and compare these with other studied sites in South Africa; (c) to determine the phytogeographical affinities of the serpentinite endemics of the BGB through their close relatives; and (d) to determine whether environmental factors such as size, altitude, and soil properties (i.e. pH, total nickel, total chromium, magnesium-to-calcium ratio) influence species numbers and endemism on serpentinite sites.

## STUDY AREA

Dunbar Valley occurs within the Songimvelo Game Reserve (SGR), which is situated in the Barberton

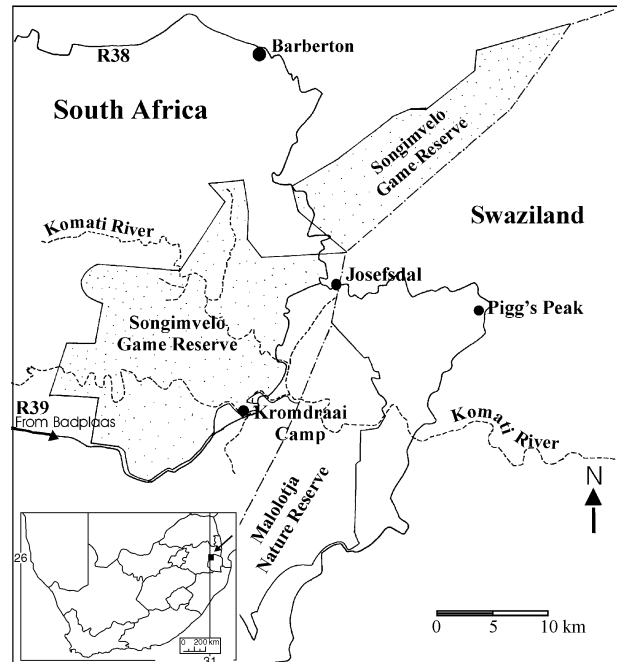

**Figure 1.** The locality of the Songimvelo Game Reserve in Mpumalanga, South Africa.

Mountainland of Mpumalanga, South Africa. The Dunbar Valley serpentinite site is at the lower end of the altitudinal range (800–880 m) of the SGR with an approximate area of 1.9 km<sup>2</sup> (Fig. 1). The vegetation of the SGR is highly diverse with representation of three biomes, namely Savanna, Grassland, and Forest (Stalmans, Robinson & Balkwill, 1999). The Dunbar Valley serpentinite outcrop falls within the Grassland Biome.

The SGR is drained by numerous perennial rivers and streams, of which the Komati is the most important. Rains fall mainly from November to March and vary from less than 800 mm per annum in the lowland areas to over 1600 mm in the high-altitude areas. The mean minimum and maximum monthly temperatures range between 5.4 and 7.9°C in July and 22 and 34°C in January for the highland and lowland areas, respectively, and frost is common in winter months (Anonymous, 1986; Gamble, 1988). The local people living within this area are the bakaNgwane people from Swaziland. They are peasant farmers cultivating crops (mainly maize) and keeping livestock in the form of cattle.

The SGR supports large game including African elephant [*Loxondonta africana* (Blumenbach)], white rhinoceros [*Ceratotherium simum* (Burchell)], eland [*Taurotragus oryx* (Pallas)], Burchell's zebra [*Equus burchelli* (Gray)] and blue wildebeest [*Connochaetes taurinus* (Burchell)]. Others are kudu [*Tragelaphus strepsiceros* (Pallas)], mountain reedbuck [*Redunca fulvorufula* (Afzelius)], warthog [*Phacochoerus aethi-*

*opicus* (Pallas)] and hippopotamus (*Hippopotamus amphibius* L.).

## MATERIAL AND METHODS

### COMPILATION OF CHECKLIST OF FLORA

A preliminary systematic checklist of the Dunbar Valley serpentinite site was obtained from the computerized database of the C. E. Moss Herbarium Management System and is arranged following the Engler system (Arnold & De Wet, 1993) and the electronic update of the same (Plants in southern Africa database). The checklist was a compilation of plant specimens collected and currently deposited in the C. E. Moss Herbarium by K. Balkwill, M.-J. Balkwill, F. Hologne, A. Lee, E. Masilo, M. Stalmans and S. D. Williamson. Unidentified material collected and deposited in the C. E. Moss Herbarium and that collected from modified-Whittaker plots during this study were identified using the Quick Guides and relevant literature. The identification of the specimens on the checklist that represented taxa not already on the checklist were verified before names were added to the computerized Herbarium Management System, which was used to update the checklist. The currently accepted conservation status of each taxon on the checklist was ascertained using the *Red Data List of Southern African Plants* and its updates (Hilton-Taylor, 1996a,b, 1997).

### ENDEMICS AND THEIR PHYTOGEOGRAPHICAL AFFINITIES

Because endemic taxa are restricted to the serpentinite patches in the BGB, their phytogeographical affinities cannot be inferred from their distributions, and thus the distributions of closest relatives were used for this purpose. Keys, cladograms, statements of relationships, and natural groupings in recent monographs, revisions, and relevant literature were used to determine the close relatives of the serpentinite endemics. The distributions of the close relatives were determined from maps in monographs and revisions or drawn from data obtained from PRECIS, the computerized information system of the National Botanical Institute in Pretoria, South Africa. The distribution of the close relatives was compared with the phytogeographical regions proposed by Werger (1978) and a phytogeographical affinity was assigned on this basis. A chi-square test of goodness of fit ( $\chi^2$ ) was used to determine whether the endemics were evenly distributed among the families.

### SPECIES RICHNESS AND DIVERSITY

To determine  $\alpha$ - and  $\beta$ -diversity of serpentinite and non-serpentinite sites, vegetation sampling was con-

ducted between 12 and 22 May 2000. Modified-Whittaker plots (Stohlgren, Falkner & Schnell, 1995) were used. Six 20 m  $\times$  50 m plots with their subplots were sampled, three on serpentinite and three on the adjacent non-serpentinite. These plots were placed parallel to the contours of the hill (i.e. at right angles to a habitat gradient) on both serpentinite and non-serpentinite sites. The first plot was placed at the base of the slope. The second plot was placed in the middle of the slope and the third on the crest of the hill.

Ten 1 m<sup>2</sup> (0.5 m  $\times$  2 m) and two 10 m<sup>2</sup> (2 m  $\times$  5 m) subplots were placed systematically inside the perimeter of the 1000 m<sup>2</sup> (20 m  $\times$  50 m) plot and one 100 m<sup>2</sup> (5 m  $\times$  20 m) subplot was centred in the plot. The three subplots were independent and non-overlapping. From the ten outer perimeter 0.5 m  $\times$  2 m non-contiguous plots, the numbers of species were recorded on the field data sheet. The same procedure was applied for the two 2 m  $\times$  5 m outer perimeter and non-overlapping subplots and within the one 5 m  $\times$  20 m centred subplot. Additional species occurring in the 20 m  $\times$  50 m plot were recorded. The modified-Domain Scale (Kent & Coker, 1994) was used to determine the relative percentage cover of individual plant species in the 20 m  $\times$  50 m plot. The same procedure was repeated on the non-serpentinite site.

Species were classified as trees if they appeared in *Trees of Southern Africa* (Coates Palgrave, 1983).  $\chi^2$  was used to test whether frequency occurrences of monocotyledons and dicotyledons on serpentinite and non-serpentinite deviated significantly (Watt, 1997) from the expected ratio of 1 : 3 (ratio based on the total number of monocotyledons and total number of dicotyledons recorded in South Africa (Arnold & De Wet, 1993)).

$\beta$ -diversity between serpentinite and non-serpentinite sites was calculated using Sørensen's index ( $Q_s$ ):

$$Q_s = [2c/(a + b)]100$$

where  $a$  and  $b$  are the number of species occurring on serpentinite and non-serpentinite sites, respectively, and  $c$  is the number of species shared by  $a$  and  $b$  (Kent & Coker, 1994). This was compared with other studied sites in the BGB (S. D. Williamson *et al.*, unpubl. data). The  $\alpha$ -diversity was calculated using the Shannon–Wiener index ( $H'$ ) as (Kent & Coker, 1994):

$$H' = -\sum_{i=1}^s p_i \ln p_i$$

where  $s$  is the number of species,  $p_i$  is the proportion of the individuals or the abundance of the  $i$ th species expressed as a proportion of the total cover and  $\ln$  is the logarithm to the base  $e$ . The Shannon–Wiener index ( $H'$ ) is widely used as it combines species richness and evenness and it is not affected by sample size (Kent & Coker, 1994).

Student's *t*-tests (Watt, 1997) were used to test for significant differences between average species richness of the serpentinite and non-serpentinite sites and also to test whether total numbers of species and endemics were correlated with environmental variables such as size or area, altitude, and soil chemical properties (i.e. levels of nickel, chromium, pH, magnesium-to-calcium ratio) for six sites in the BGB (i.e. Agnes Mine, Diepgezet, Kaapsehoop, Mundt's Concession, Groenvaly, and Dunbar Valley). Correlation coefficients were used to determine whether altitude influenced phytogeographical affinities (i.e. Sudano-Zambeian, Afromontane and Tongaland-Pondoland Regions) of the endemics present at a site.

## RESULTS

### CHECKLIST OF FLORA

The Dunbar Valley serpentinite site has a total of 254 species and infraspecific taxa in 172 genera and 63 families (Appendix, Table 1). Pteridophytes are represented by only one family, two genera and four taxa. Monocotyledons are relatively few, contributing 15.9% at family level, 24.2% at generic level, and 25.2% at

species and infraspecific taxon level. The family Gramineae makes up 65.0% of the monocotyledon species and 17.2% of the total flora. There is no dominant genus in this family. Cyperaceae is the second largest monocotyledon family, contributing about 2.8% to the total number of species at Dunbar Valley.

The dicotyledons are in the majority, comprising 186 species of the Dunbar Valley flora. Four families dominate: Compositae (30 species, 11.8% of the total species); Leguminosae (23 species, 9.1%); Asclepiadaceae (13 species, 5.1%); and Euphorbiaceae (11 species, 4.3%). These families represent 30.3% of the total Dunbar Valley flora. Dicotyledons are dominant at family (68.2%), generic (74.4%), and species and infraspecific taxon (73.2%) levels (Table 1).

Gramineae has the highest number of taxa of the total Dunbar Valley flora but a relatively low species-to-genus ratio of 1.7, indicating that there is a spread of taxa over a number of genera (Table 2). By contrast, Thymelaeaceae has a high species-to-genus ratio of 3.0, indicating that its taxa are spread within a few genera. In the flora as a whole, Rubiaceae has the lowest species-to-genus ratio of 1.0, represented by seven taxa in seven genera. The genus *Senecio* has the highest total number of taxa at all the studied sites except

**Table 1.** Numbers of families, genera, species, and infraspecific taxa of the Dunbar Valley serpentinite site

| Taxonomic level                | Pteridophytes |     | Angiosperms<br>Monocotyledons |      | Dicotyledons |      | All<br>Total |
|--------------------------------|---------------|-----|-------------------------------|------|--------------|------|--------------|
|                                | Total         | %   | Total                         | %    | Total        | %    |              |
| Family                         | 1             | 1.6 | 10                            | 15.9 | 52           | 68.2 | 63           |
| Genus                          | 2             | 1.2 | 42                            | 24.2 | 128          | 74.4 | 172          |
| Species and infraspecific taxa | 4             | 1.6 | 64                            | 25.2 | 186          | 73.2 | 254          |

**Table 2.** Number of genera, species and infraspecific taxa in families represented by five or more species and the species:genus ratio for those families at Dunbar Valley

| Family                       | Genera |         | Species |         | Species-to-genus<br>ratio |
|------------------------------|--------|---------|---------|---------|---------------------------|
|                              | Total  | % total | Total   | % total |                           |
| Gramineae                    | 26     | 15.1    | 44      | 17.2    | 1.7                       |
| Compositae                   | 13     | 7.6     | 30      | 11.8    | 2.3                       |
| Leguminosae (Papilionoideae) | 13     | 7.6     | 23      | 9.1     | 1.8                       |
| Asclepiadaceae               | 8      | 4.6     | 13      | 5.1     | 1.6                       |
| Euphorbiaceae                | 8      | 4.6     | 11      | 4.3     | 1.4                       |
| Rubiaceae                    | 7      | 4.1     | 7       | 2.8     | 1                         |
| Cyperaceae                   | 6      | 3.5     | 7       | 2.8     | 1.2                       |
| Labiatae                     | 5      | 2.9     | 7       | 2.8     | 1.4                       |
| Scrophulariaceae             | 5      | 2.9     | 7       | 2.8     | 1.4                       |
| Acanthaceae                  | 5      | 2.9     | 8       | 3.1     | 1.6                       |
| Thymelaeaceae                | 2      | 1.2     | 6       | 2.4     | 3                         |

**Table 3.** Number of taxa at different hierarchical levels and numbers of endemics at Agnes Mine (AM), Mundt's Concession (MC), Diepgezet (DG), Kaapsehoop (KH), Groenvaly (GV) and Dunbar Valley (DV) in South Africa. Values in bold type are the highest in each row

| Level                           | Serpentine sites |     |            |       |             |            |
|---------------------------------|------------------|-----|------------|-------|-------------|------------|
|                                 | AM               | MC  | DG         | KH    | GV          | DV         |
| Families                        | 50               | 35  | 62         | 49    | 54          | <b>63</b>  |
| Genera                          | 147              | 83  | <b>191</b> | 127   | 132         | 172        |
| Species and infraspecific taxa  | 201              | 104 | 209        | 170   | 198         | <b>254</b> |
| Endemics                        | <b>14</b>        | 6   | 5          | 9     | 6           | 5          |
| % Endemism                      | <b>6.9</b>       | 5.8 | 2.4        | 5.3   | 3           | 2          |
| Size of site (km <sup>2</sup> ) | 6.75             | 8.5 | 0.74       | 11.63 | <b>14.5</b> | 1.9        |

Dunbar Valley. The Dunbar Valley flora has a 2.0% level of endemism with five serpentine endemics, namely *Berkheya coddii*, *B. rehmannii* var. *rogersiana*, *Helichrysum* sp. nov., *Ocimum* sp. nov. 1 and *Sartidia* sp. nov. (Table 3).

#### ENDEMICS AND THEIR PHYTOGEOGRAPHICAL AFFINITIES

Thirty-one serpentine endemics are significantly unevenly distributed among families ( $\chi^2 = 37.95$ ,  $P < 0.05$ , d.f. = 1) and they show affinities with three phytogeographical regions (Table 4). Approximately 53% of the endemics show affinities with the Sudano-Zambezian Region, 42% with the Afromontane Region and 5% with the Tongaland-Pondoland Regional Mosaic. There was no correlation ( $r$ -values  $< 0.5100$ ) between altitude and numbers of endemics with any particular phytogeographical region.

#### SPECIES RICHNESS AND DIVERSITY

In modified-Whittaker plots, the total number of taxa recorded on serpentine and non-serpentine sites were 57 and 65, respectively, of which 19 taxa were recorded on both sites. Thirty-five dicotyledons and 30 monocotyledons were recorded on serpentine plots. Thirty-four dicotyledons and 30 monocotyledons were recorded on non-serpentine plots. A chi-square test showed no significant deviation ( $\chi^2 = 3.45$ ,  $P > 0.05$ , d.f. = 1) from the expected ratio of 1 : 3 for monocotyledons and dicotyledons on serpentine whereas on non-serpentine it showed a significant departure from the expected ratio ( $\chi^2 = 16.08$ ,  $P < 0.05$ , d.f. = 1). Of the 57 species recorded on serpentine, 78.9% were herbs and 21.1% were trees/shrubs. On the non-serpentine site, herbs accounted for 83.1% and trees/shrubs accounted for 16.9%.

The quotient of similarity (Sørensen's index) between the two sites was 31.2% (Table 5a). The

Sørensen's indices within serpentine plots ranged from 35.7 to 57.6% whereas for non-serpentine they ranged from 28.1 to 44.4% (Table 5b). A  $t$ -test showed no significant difference between Sørensen's indices within serpentine and non-serpentine plots. The Shannon–Wiener index ( $H'$ ) per 0.1 ha was  $2.631 \pm 0.901$  on the serpentine site and  $2.886 \pm 0.310$  on the non-serpentine site. Statistically, there was no significant difference ( $P > 0.05$ ) in  $\alpha$ -diversity between the two sites (Table 6). Species richness per 0.1 ha for serpentine and non-serpentine sites was  $29.0 \pm 4.3$  and  $31.7 \pm 2.9$ , respectively (not significantly different,  $P > 0.05$ , Table 7).

Total species for six sites showed significant negative correlation with nickel ( $P < 0.05$ ), altitude, and size ( $P < 0.05$ ), whereas pH, chromium, and magnesium-to-calcium ratio showed no correlations. Endemism showed no correlation with soil chemical properties, altitude, or size.

## DISCUSSION

### THE FLORA OF THE DUNBAR VALLEY SERPENTINITE SITE

The flora of Dunbar Valley with 254 species in 172 genera and 63 families can be described as relatively species rich in comparison with other studied serpentine sites in South Africa (Tables 1, 3). Low levels in families, genera, and species occur at Mundt's Concession. The higher number of taxa recorded at Dunbar Valley may be due to the duration, density, and intensity of collection compared with other sites. The flora has few pteridophytes, a situation similar to other studied serpentine sites in the BGB (Kidger, 1993; Williamson, 1994; Balkwill & Balkwill, 1999).

Monocotyledons usually make up between 40% and 60% of total species on serpentine sites (Werger, Wild & Drummond, 1978). From modified-Whittaker plots sampled at Dunbar Valley, monocotyledons accounted

**Table 4.** Endemics of studied sites, their close relatives and the phylogeographical affinities of the close relatives. SZ = Sudano-Zambezian Region, AM = Afromontane Region and TP = Tongaland-Pondoland Region. (\*\*Serpentine endemics at Dunbar Valley; + vulnerable taxa.)

| Taxon                                                                                                | Close relative(s)                                                                  | Source                                | SZ | AM | TP |
|------------------------------------------------------------------------------------------------------|------------------------------------------------------------------------------------|---------------------------------------|----|----|----|
| + <i>Aloe thorncroftii</i> Pole-Evans                                                                | <i>Aloe suprafoliata</i> Pole-Evans                                                | Van Wyk & Smith (1996)                | +  |    |    |
| <i>Asystasia subbiflora</i> C.B. Clarke                                                              | <i>Asystasia retrocarpa</i> T.J. Edwards                                           | Edwards (1991)                        | +  |    |    |
| <i>Athrixia</i> sp. nov.                                                                             | <i>Athrixia subsimplex</i> Brenan                                                  | Smith & Balkwill (in press)           |    | +  |    |
| ** <i>Berkheya coddii</i> Roessler                                                                   | <i>Berkheya angotensis</i> O. Hoffm.                                               | Williamson (1994) and Röessler (1959) | +  |    |    |
| ** <i>Berkheya nivea</i> N.E. Br.                                                                    | <i>Berkheya rehmannii</i> Thell. var. <i>rehmannii</i>                             | Williamson (1994) and Röessler (1959) | +  |    |    |
| ** <i>Berkheya</i> Thell. <i>rehmannii</i> var. <i>rogersiana</i> Thell.                             | <i>Berkheya rehmannii</i> Thell. var. <i>rehmannii</i>                             | Williamson (1994) and Röessler (1959) | +  |    |    |
| <i>Berkheya</i> sp. nov.                                                                             | <i>Berkheya seminivea</i> Harv. & Sond.                                            | Williamson (1994) and Röessler (1959) | +  |    |    |
| <i>Brachystelma dyeri</i> K. Balkwill & M. Balkwill                                                  | <i>Brachystelma gracile</i> E.A. Bruce                                             | Dyer (1983)                           | +  |    |    |
| <i>Brachystelma</i> sp. nov.                                                                         | <i>Brachystelma frankiae</i> N.E. Br.                                              | Dyer (1983)                           | +  |    |    |
| <i>Cheilanthes</i> sp. nov.                                                                          | <i>Cheilanthes hirta</i> Sw. var. <i>hirta</i>                                     | Burrows (1990)                        | +  |    |    |
| <i>Cyphia bolusii</i> E. Phillips                                                                    | <i>Cyphia alba</i> N.E. Br.                                                        | Wimmer (1968)                         |    | +  |    |
| <i>Cyphia elata</i> Harv. var. <i>gerrardii</i> (Harv.)<br>E. Wimm. forma <i>decurrrens</i> E. Wimm. | <i>Cyphia elata</i> Harv. var. <i>elata</i>                                        | Wimmer (1968)                         |    | +  |    |
| <i>Dicoma</i> sp. nov.                                                                               | <i>Dicoma zeyheri</i> Sond.                                                        | Pope (1991)                           | +  |    |    |
| <i>Dicoma</i> sp. nov.                                                                               | <i>Dicoma anomala</i> Sond.                                                        | Pope (1991)                           | +  |    |    |
| <i>Gladiolus serpeniticola</i> Goldblatt & J.C. Manning                                              | <i>Gladiolus crassifolius</i> Baker                                                | Goldblatt & Manning (1998)            |    | +  |    |
|                                                                                                      | <i>Gladiolus hollandii</i> L. Bolus                                                | Goldblatt & Manning (1998)            | +  |    |    |
|                                                                                                      | <i>Gladiolus densiflorus</i> Baker                                                 | Goldblatt & Manning (1998)            |    |    | +  |
| <i>Gymnosporia</i> sp. nov.                                                                          | <i>Gymnosporia heterophylla</i> Loes.                                              | Jordaan (unpubl. data)                |    |    | +  |
| ** <i>Helichrysum</i> sp. nov.                                                                       | <i>Helichrysum confertifolium</i> Klatt                                            | Lee (1996)                            |    | +  |    |
| <i>Indigofera crebra</i> N.E. Br.                                                                    | <i>Indigofera ingrata</i> N.E. Br.                                                 | Brown (1925)                          | +  |    |    |
|                                                                                                      | <i>Indigofera tristoides</i> N.E. Br.                                              | Brown (1925)                          |    | +  |    |
| <i>Inezia</i> sp. nov.                                                                               | <i>Inezia spectiosa</i> F. Bruce                                                   | Smith & Balkwill (in press)           |    | +  |    |
| ** <i>Ocimum</i> sp. nov. 1                                                                          | <i>Ocimum obovatum</i> E. Mey. ex Benth. ssp. <i>obovatum</i> var. <i>obovatum</i> | Balkwill (unpubl. data)               | +  |    |    |
| <i>Ocimum</i> sp. nov. 2                                                                             | <i>Ocimum obovatum</i> E. Mey. var. <i>hians</i>                                   | Balkwill (unpubl. data)               | +  |    |    |
| <i>Ozoroa barbertonensis</i> Retief                                                                  | <i>Ozoroa albicans</i> R. Fern. & A. Fern.                                         | Retief (1990)                         | +  |    |    |
|                                                                                                      | <i>Ozoroa schinzii</i> R. Fern. & A. Fern.                                         | Retief (1990)                         | +  |    |    |
| <i>Ozoroa</i> sp. nov.                                                                               | <i>Ozoroa barbertonensis</i> Retief                                                | Balkwill (unpubl. data)               | +  |    |    |
| + <i>Protea curvata</i> N.E. Br.                                                                     | <i>Protea laetans</i> L.E. Davidson                                                | Rourke (1980)                         |    | +  |    |
|                                                                                                      | <i>Protea comptonii</i> Beard                                                      | Rourke (1980)                         |    | +  |    |
| <i>Rhus pygmaea</i> Moffett                                                                          | <i>Rhus pondoensis</i> Schönll.                                                    | Moffett (1999)                        |    | +  |    |
| <i>Salpinctum hirsutum</i> T.J. Edwards                                                              | <i>Salpinctum natalense</i> T.J. Edwards                                           | Edwards & Getliffe Norris (1989)      | +  |    |    |
| ** <i>Sartidia</i> sp. nov.                                                                          | <i>Sartidia jucunda</i> (Schweick.) De Winter                                      | Gibbs Russel <i>et al.</i> (1990)     | +  |    |    |
| <i>Senecio</i> sp. nov.                                                                              | <i>Senecio anomalochrous</i> Hilliard                                              | Balkwill & Balkwill (1999)            |    | +  |    |
| <i>Senecio</i> sp. nov.                                                                              | <i>Senecio coronatus</i> Harv.                                                     | Balkwill & Balkwill (1999)            |    | +  |    |
| <i>Sclerochiton triacanthus</i> A. Meeuse                                                            | <i>Sclerochiton ilicifolius</i> A. Meeuse                                          | Vollesen (1991)                       | +  |    |    |
| <i>Thunbergia galpinii</i> Lindau                                                                    | <i>Thunbergia atriplicifolia</i> E. Mey.                                           | Balkwill & Campbell (1999)            |    | +  |    |
| Total = 31                                                                                           |                                                                                    |                                       | 19 | 15 | 2  |

**Table 5a.** Sørensen's indices of similarities between serpentinite and non-serpentinite sites at Rosentuin (RT), Sawmill (SM), Kalkloof (KL), Groenvaly (GV), Mundt's Concession (MC), Magnesite (MM), Dunbar Valley (DV), and Core Zone (CZ). (Dunbar Valley site based on present study; information for other sites based on unpublished data of S. D. Williamson and co-workers.)

|          | RT    | SM    | KL    | GV    | MC    | MM    | DV           | CZ    |
|----------|-------|-------|-------|-------|-------|-------|--------------|-------|
| S' Index | 0.461 | 0.440 | 0.434 | 0.399 | 0.393 | 0.359 | <b>0.312</b> | 0.311 |

**Table 5b.** Sørensen's indices within serpentinite plots and non-serpentinite plots at Dunbar Valley ( $t = 10.144, P > 0.05$ )

| Plots | Serpentinite  | Plots | Non-serpentinite |
|-------|---------------|-------|------------------|
| 1 & 2 | 0.576         | 4 & 5 | 0.444            |
| 1 & 3 | 0.357         | 4 & 6 | 0.295            |
| 2 & 3 | 0.441         | 5 & 6 | 0.281            |
| Mean  | 0.458 ± 0.274 | Mean  | 0.339 ± 0.224    |

**Table 6.** Species diversity ( $H'$ ) for serpentinite and non-serpentinite sites in the Dunbar Valley

| Site             | Shannon-Wiener index ( $H'$ ) | $T$ -value | $P$ at 0.05 |
|------------------|-------------------------------|------------|-------------|
| Serpentinite     | 2.631 ± 0.901                 | 25.213     | n.s.        |
| Non-serpentinite | 2.886 ± 0.130                 |            |             |

**Table 7.** Average species richness (i.e. number of species recorded per 1000 m<sup>2</sup>) on serpentinite and non-serpentinite sites. (Dunbar Valley site based on present study; information for other sites based on unpublished data of S. D. Williamson and co-workers.)

| Site               | Serpentinite  | Non-serpentinite | Probability level |      |
|--------------------|---------------|------------------|-------------------|------|
| Rosentuin          | 72.25 ± 11.65 | 69.00 ± 5.15     | $P > 0.05$        | n.s. |
| Sawmill            | 75.00 ± 5.79  | 78.50 ± 9.66     | $P > 0.05$        | n.s. |
| Kalkloof           | 83.50 ± 6.58  | 81.50 ± 8.73     | $P > 0.05$        | n.s. |
| Groenvaly          | 80.25 ± 6.80  | 73.50 ± 10.74    | $P < 0.05$        | *    |
| Mundt's Concession | 65.00 ± 3.08  | 67.50 ± 4.72     | $P > 0.05$        | n.s. |
| Magnesite          | 73.00 ± 6.63  | 54.25 ± 9.36     | $P < 0.05$        | *    |
| Dunbar Valley      | 29.00 ± 4.30  | 31.66 ± 2.88     | $P > 0.05$        | n.s. |
| Core Zone          | 75.50 ± 4.82  | 84.00 ± 5.15     | $P < 0.05$        | *    |

for 36.4% of angiosperms on serpentinite and 46.9% on non-serpentinite. Statistically, there was no significant difference in the number of monocotyledons between serpentinite and non-serpentinite ( $t = 9.00, P > 0.05, d.f. = 1$ ). However, these findings are area-specific and cannot be generalized because different environmental factors and anthropogenic activities as well as evolutionary history prevail at different serpentinite areas.

The floristic poverty of the serpentinite soils on the Great Dyke in Zimbabwe is attributed to tree species being almost absent from the serpentinite soils (Wild, 1965). At Dunbar Valley, 78.9% of the species recorded

on modified-Whittaker plots were herbs (i.e. grasses, forbs, or sedges) with few trees. This could be attributed to trees having tap root systems and nickel affecting the root meristem (Robertson, 1992).

The most speciose genus occurring on serpentinite sites in the BGB is *Senecio*. However, genera such as *Helichrysum*, *Vernonia*, *Pearsonia*, *Acalypha*, *Eragrostis*, *Berkheya*, and *Gnidia* are also well represented. The largest families are Gramineae, Compositae, Leguminosae (Papilionoideae), Asclepiadaceae, Euphorbiaceae, Rubiaceae, Cyperaceae, Labiatae, Scrophulariaceae, Acanthaceae, and Thymelaeaceae (Table 2). These families are also among the largest in

other studied serpentinite sites in the BGB (Kidger, 1993; Williamson, 1994; Balkwill & Balkwill, 1999).

The 2.0% level of endemism (Table 3) at Dunbar Valley is less than the 2.7% for all the studied serpentinite sites in the BGB. These endemics occur in all vascular plant groups; pteridophytes, monocotyledons, and dicotyledons, with the largest number of endemics occurring in Compositae (14) followed by Acanthaceae (four). Families contributing least to the serpentinite endemics are Adiantaceae, Celastraceae, Iridaceae, Leguminosae, Liliaceae, Gramineae and Proteaceae.

Of the 254 taxa recorded, nine are listed as red data taxa (Hilton-Taylor, 1996a,b, 1997). Four taxa are classed as not threatened [*Dianthus mooiensis* F.N. Williams ssp. *kirkii* (Burtty Davy) Hooper, *Protea gagedi* J.F. Gmel., *Heteropyxis canescens* Oliv. and *Xerophyta villosa* (Baker) L.B. Sm. & Ayensu]; two are classed as insufficiently unknown (*Rhus pondoensis* Schönk. and *Berkheya coddii*); two as rare [*Asclepias eminens* (Harv.) Schltr. and *Acalypha angustata* Sond. var. *glabra* Sond.]; and one as indeterminate (*Pegoletia lanceolata* Harv.). Two endemics (*Aloe thorncroftii* Pole-Evans and *Protea curvata* N.E. Br.) of the serpentinite sites of the BGB are classified as vulnerable (Table 4). The presence of red data species makes it imperative to conserve serpentinite sites.

Serpentinite sites are considered living laboratories where processes of evolution can be studied *in situ* (Kruckeberg, 1984). Some serpentine hyperaccumulating species may be used for bio-recovery of minerals and other metal-tolerant species may be very useful for successfully rehabilitating mine tailings and workings (Brooks, 1987; Liston & Balkwill, 1997). Therefore, Dunbar Valley, with five endemic species and two hyperaccumulators (*Berkheya coddii* and *B. rehmannii* var. *rogersiana*), can be regarded as a reservoir of rare and specialized species with high potential for contributing considerably to the understanding of evolutionary science and to the restoration of vegetation after mining of metals (Bradshaw, 1997).

#### PHYTOGEOGRAPHICAL AFFINITIES OF THE SERPENTINITE ENDEMICS OF THE BGB

Restriction of endemic species to serpentinite sites varies from highly localized (a single outcrop) to regional and widespread occurrences (Kruckeberg, 1984). *Helichrysum* sp. nov. near *H. confertifolium* Klatt, recorded only at Dunbar Valley (Lee, 1996), shows a striking example of a very highly localized endemic.

The site-by-site comparison of the occurrences of endemics based on lowest and highest altitudes showed no correlation ( $P > 0.05$ ) with phytogeographical regions (i.e. Sudano-Zambeian, Afromontane or

Tongaland-Pondoland), indicating that altitude in the BGB does not appear to influence the phytogeographical affinities of serpentinite endemics. The endemics have by far the strongest phytogeographical affinities with the Sudano-Zambeian Region.

#### SPECIES RICHNESS AND DIVERSITY OF DUNBAR VALLEY IN COMPARISON WITH OTHER SITES

Like other studied sites in the BGB (Table 5a), Dunbar Valley has a low level of similarity in species composition ( $\beta$ -diversity) between serpentinite and non-serpentinite sites. Quotients of similarity within serpentinite and non-serpentinite showed low levels of species overlap within each of the habitats (Table 5b). This could be due to differences in vegetation ecoclines (Lee, 1996) affecting both serpentinite and non-serpentinite soils. The low levels in species richness per 0.1 ha at Dunbar Valley in comparison with other sites could be attributed to differences in timing of sampling.

Kruckeberg (1954) suggested that serpentinite soils should have low species richness because of extreme deficiency in soil nutrients and high concentrations of heavy metals. Del Moral (1972) found that because no continuous canopy developed on serpentinite, the resultant heterogeneity caused higher diversity than on surrounding non-serpentinite where mature forest developed. Whittaker (1960) found that species richness in the Siskiyou Mountains in the USA was higher on serpentinite soils than on non-serpentinite soils. Conversely, Werger *et al.* (1978) found a lower species number on serpentinite than on non-serpentinite soils. At Dunbar Valley, there was no significant difference ( $P > 0.05$ ) in species diversity ( $H'$ ) between serpentinite and non-serpentinite sites (Table 6). This might have been due to the non-serpentinite plots having been purposely placed on grassland of the non-serpentinite area.

Within the BGB, species richness was significantly higher on serpentinite than on adjacent non-serpentinite soils at two of seven sites (Table 7). One site had species richness significantly higher on non-serpentinite soil than on serpentinite soil whereas four sites showed no significant differences in species richness. This study showed no significant difference ( $P > 0.05$ ) in species richness between serpentinite and non-serpentinite soils at Dunbar Valley, a situation similar to some studied sites in the BGB (Table 7). These findings suggest that the effect of serpentinite soils on species richness is area-specific, resulting from a complex interplay of many factors such as soil chemical composition, altitude, and size of the serpentinite outcrop. Sometimes other factors such as soil moisture, the nature of dispersal, and competitive abilities of colonizing plants and major disturbance events such as



fire, grazing, and other human activities can outweigh the importance of serpentinite soils in determining species richness (Proctor & Craig, 1978; Tokeshi, 1999).

Wilson, Lee & Mark (1990) found that there was a decrease in total species with increased altitude in New Zealand on serpentinite soils. A similar situation occurs in the BGB. A significant negative correlation ( $P < 0.05$ ) exists between total species and altitude. Negative correlation between total species and altitude can be considered to result from: (a) lower temperatures – some plant species do not withstand extremely low temperatures; and (b) increased isolation of some habitats at higher altitudes (Tokeshi, 1999).

The significant negative correlation ( $P < 0.05$ ) between total species and total nickel concentration shows that fewer plant species can survive at higher concentrations of nickel in the soil. The phytotoxicity of nickel has been suggested to be one of the factors causing serpentinite soils to be infertile (Brooks, 1987). Therefore, it can be suggested that nickel plays a role in the determination of species diversity on the serpentinite sites in the BGB.

The weak negative correlation ( $r = -0.4538$ ) between total species and area for six sites in the BGB shows a departure from the generalized phenomenon of positive linear correlation on contemporary patterns in plant community ecology and the prediction that there is an increase in habitat diversity with an increase in area (Shmida, 1984; Stohlgren *et al.*, 1995). However, exceptions to this generalization in comparing species richness of the tropical areas with that of the temperate zones have been reported (Tokeshi, 1999). Endemism showed no correlation ( $r = 0.57$ ) with size of serpentinite outcrops, indicating that endemism is independent of size of area, at least in the BGB.

### CONCLUSION

The serpentinite outcrop at Dunbar Valley has a rich and diverse flora with five serpentinite endemics and one (*Helichrysum* sp. nov. near *H. confertifolium*) has only been recorded at this site, thus making it an important area for conservation of plant diversity. Like other serpentinite sites, Dunbar Valley has potential to contribute to the understanding of the evolutionary history of serpentinite species. Although the Dunbar Valley serpentinite outcrop is located within the Songimvelo Game Reserve (hence protected and relatively undisturbed), the conservation of the serpentinite site depends largely on the land-use practices that will be allowed by the Mpumalanga Parks Board, which is responsible for the management of the reserve. Cultivation of crops by the local people, cou-

pled with grazing and burning practices on the serpentinite site, could lead to loss of the serpentinite habitat.

### ACKNOWLEDGEMENTS

We would like to thank the Southern African Biodiversity Network and the University of the Witwatersrand, Herbarium Research Programme, for sponsoring this study. We thank the Director of the National Botanical Institute, Pretoria, for providing information on the distribution of some close relatives of the serpentinite endemics. We are grateful to the Mpumalanga Parks Board for allowing us to undertake this study in the Songimvelo Game Reserve and the Director of the Zambia Wildlife Authority for granting study leave to the first author.

### REFERENCES

- Anonymous.** 1986. Master plan and management guidelines for the Songimvelo Natural Resources Area. Unpublished Plan, Chris Mulder Association.
- Arnold TH, De Wet BC, eds.** 1993. Plants of southern Africa: names and distribution. *Memoirs of the Botanical Survey of South Africa* **62**: 1–825.
- Balkwill K, Campbell G.** 1999. Taxonomic studies in Acanthaceae: testa microsculpturing in southern African species of *Thunbergia*. *Botanical Journal of the Linnean Society* **131**: 301–325.
- Balkwill K, Williamson SD, Kidger CL, Robinson ER, Stalmans M, Balkwill MJ.** 1997. Diversity and conservation of serpentine sites in southern Mpumalanga (Eastern Transvaal), South Africa. In: Jaffré T, Reeves RD, Becquer T, eds. *The ecology of ultramafic and metalliferous areas*. Nouméa: Orstom, 133–138.
- Balkwill MJ, Balkwill K.** 1999. *Characteristics, diversity, endemism and conservation of selected serpentine sites in the Barberton Greenstone Belt*. Unpublished Post Congress Tour Booklet, University of the Witwatersrand.
- Bradshaw AD.** 1997. Restoration after mining of metals – an ecological view. In: Jaffré T, Reeves RD, Becquer T, eds. *The ecology of ultramafic and metalliferous areas*. Nouméa: Orstom, 239–248.
- Brooks RR.** 1987. *Serpentine and its vegetation: a multi-disciplinary approach*. London: Croome Helm Limited.
- Brown NE.** 1925. New species of *Indigofera* from Transvaal and Swaziland. Bulletin of miscellaneous information. *Kew Bulletin* **1925**: 142–159.
- Burrows JE.** 1990. *Southern African ferns and fern allies*. Sandton: Frandsen.
- Coates Palgrave K.** 1983. *Trees of Southern Africa*. Cape Town: C. Struik.
- Del Moral R.** 1972. Diversity patterns in forest vegetation of the Wenatchee Mountains, Washington. *Bulletin of the Torrey Botanical Club* **99**: 57–64.

- Dyer RA. 1983.** *Ceropegia, Brachystelma and Riocreuxia in southern Africa*. Rotterdam: A.A. Balkema.
- Edwards TJ. 1991.** A new species of *Asystasia* from southern Africa, with notes on its alliances. *South African Journal of Botany* **57**: 305–309.
- Edwards TJ, Getliffe Norris F. 1989.** *Salpinctum*, a new genus of Acanthaceae in southern Africa. *South African Journal of Botany* **55**: 6–10.
- Gamble F. 1988.** Climate of the Transvaal Escarpment. In: Ferrar AA, Isaacs G, Stacey JR, eds. *Environmental conservation features of the Transvaal Escarpment*. Pretoria: Council for Scientific Institute and Research.
- Gibbs Russell GE, Watson L, Koekemoer M, Smook L, Barker NP, Anderson HM, Dallwitz MJ. 1990.** Grasses of southern Africa. *Memoirs of the Botanical Survey of South Africa* **58**: 1–438.
- Goldblatt P, Manning J. 1998.** *Gladiolus in Southern Africa*. South Africa: Fernwood Press.
- Hilton-Taylor C. 1996a.** Red Data List of southern African plants. *Strelitzia* **4**: 1–117.
- Hilton-Taylor C. 1996b.** Red Data List of southern African plants. 1. Corrections and additions. *Bothalia* **27**: 177–182.
- Hilton-Taylor C. 1997.** Red Data List of southern African plants. 2. Corrections and additions. *Bothalia* **27**: 195–209.
- Kent M, Coker P. 1994.** *Vegetation description and analysis: a practical approach*. Chichester: John Wiley and Sons Ltd.
- Kidger CL. 1993.** *Floristics of Josefsdal serpentine outcrop in Songimvelo Game Reserve*. Unpublished Honours Project. University of the Witwatersrand.
- Kruckeberg AR. 1954.** The ecology of serpentine soils. 2. Plant species in relation to serpentine soils. *Ecology* **35**: 267–274.
- Kruckeberg AR. 1984.** California serpentine: flora, vegetation, geology, soils and management problems. *University of California Publications in Botany* **78**: 1–180.
- Lee A. 1996.** *The floristics of the serpentine soils of Dunbar Valley, Songimvelo Game Reserve*. Unpublished Honours Project. University of the Witwatersrand.
- Liston RJ, Balkwill K. 1997.** Suitability of serpentine plants for the revegetation of chrysotile asbestos tailings. In: Jaffré T, Reeves RD, Becquer T, eds. *The ecology of ultramafic and metalliferous areas*. Nouméa: Orstom, 275–283.
- Moffett RO. 1999.** A new species of *Rhus* (Anacardiaceae), endemic to serpentine near Barberton, Mpumalanga (Eastern Transvaal). *Botanical Journal of the Linnean Society* **130**: 37–42.
- Morrey DR, Balkwill K, Balkwill MJ. 1989.** Studies on serpentine flora: preliminary analyses of soils and vegetation associated with serpentine rock formations in the south-eastern Transvaal. *South African Journal of Botany* **55**: 171–177.
- Pope GV. 1991.** Notes on *Dicoma* Cass. (Compositae). *Kew Bulletin* **46**: 699–709.
- Proctor J, Craig CG. 1978.** The occurrence of woodland and riverine forests on the serpentine of the Great Dyke, Southern Rhodesia. *Kirkia* **11**: 129–132.
- Proctor J, Nagy L. 1992.** Ultramafic rocks and their vegetation: an overview. In: Baker AJM, Proctor JE, Reeves RD, eds. *Vegetation of ultramafic (serpentine) soils*. Andover: Intercept, 469–494.
- Retief E. 1990.** A new species of *Ozoroa* from the Transvaal. *Bothalia* **20**: 219–221.
- Robertson AI. 1992.** The relation of nickel toxicity to certain physiological aspects of serpentine ecology: some facts and a new hypothesis. In: Baker AJM, Proctor JE, Reeves RD, eds. *Vegetation of ultramafic (serpentine) soils*. Andover: Intercept, 331–336.
- Rössler H. 1959.** Revision der Arctotidae-Gorteriinae (Compositae). *Mitteilungen der Botanischen Staatssammlung München* **3**: 71–500.
- Rourke JP. 1980.** *The proteas of southern Africa*. London: Purnell.
- Shmida A. 1984.** Whittaker's plant diversity sampling methods. *Israel Journal of Botany* **33**: 41–46.
- Smith S, Balkwill K. in press.** New Compositae from the serpentine soils of the Barberton Greenstone Belt, South Africa. *Kew Bulletin* in press.
- Stalmans M, Robinson ER, Balkwill K. 1999.** Ordination and classification of vegetation of Songimvelo Game Reserve in the Barberton Mountainland, South Africa for the assessment of wildlife habitat, distribution and quality. *Bothalia* **29**: 305–325.
- Stohlgren TJ, Falkner MB, Schnell LD. 1995.** A modified-Whittaker nested vegetation sampling method. *Vegetatio* **117**: 1113–1121.
- Tokeshi M. 1999.** *Species coexistence: ecological and evolutionary perspectives*. Oxford: Blackwell Science Limited.
- Van Wyk B-E, Smith GF. 1996.** *Guide to the aloes of South Africa*. Pretoria: Briza Publications.
- Vollesen K. 1991.** A revision of the African genus *Sclerochiton* (Acanthaceae: Acantheae). *Kew Bulletin* **46**: 1–50.
- Watt TA. 1997.** *Introductory statistics for biology students*. London: Chapman & Hall.
- Wenger MJA. 1978.** *Biogeography and ecology of Southern Africa*. The Hague: Dr W. Junk.
- Wenger MJA, Wild H, Drummond BR. 1978.** Vegetation structure and substrate of the northern part of the Great Dyke, Rhodesia: gradient analysis and the dominance-diversity relationships. *Vegetatio* **37**: 151–161.
- Whittaker RH. 1960.** Vegetation of the Siskiyou Mountains, Oregon and California. *Ecological Monographs* **30**: 279–332.
- Wild H. 1965.** The flora of the Great Dyke of Southern Rhodesia with special reference to the serpentine soils. *Kirkia* **5**: 49–86.
- Williamson S. 1994.** Biosystematic studies of serpentine flora in the south-eastern Transvaal. Unpublished MSc thesis, University of the Witwatersrand.
- Williamson SD, Robinson ER, Balkwill K. 1997.** Evolution of two endemic serpentine taxa in Mpumalanga. *South African Journal of Botany* **63**: 507–513.
- Wilson JB, Lee GL, Mark AF. 1990.** Species diversity in relation to an ultramafic substrate and altitude in southwest New Zealand. *Vegetatio* **86**: 15–20.
- Wimmer FE. 1968.** *Engler das Pflanzenreich Campanulaceae—Cyphioideae 4*. Berlin: Academia-Verlag.

## APPENDIX

CHECKLIST OF THE FLORA OF THE DUNBAR VALLEY  
SERPENTINITE SITE

Taxa collected at the Dunbar Valley serpentinite site, Songimvelo Game Reserve, are listed below. Families are arranged in order of the Cronquist system and genera are arranged within families following the Engler system. Each name is followed by voucher specimens, all of which are deposited in the C. E. Moss Herbarium (J). Some collectors are abbreviated as follows: AL = A. Lee, FH = F. Hologne, GVC = G. V. Cron, KB = K. Balkwill, KC = K. Changwe, KE = K. Ellery, MS = M. Stalmans, SDW = S. D. Williamson, WNE = W. N. Ellery.

## ACANTHACEAE

- Chaetacanthus costatus* Nees KB *et al.* 7635; AL 255  
*Ruellia malacophylla* C.B. Clarke AL 82  
*Ruellia stenophylla* C.B. Clarke AL 200  
*Lepidagathis scabra* C.B. Clarke AL 186  
*Barleria gueinzii* Sond. AL 79  
*Barleria ovata* E. Mey. ex Nees FH 344  
*Barleria wilmsiana* Lindau AL 223  
*Justicia anagaloides* (Nees) T. Anderson KB *et al.* 7699

## ADIANTACEAE

- Cheilanthes hirta* Sw. var. *hirta* KB 9163; WNE & KE 92/92  
*Cheilanthes involuta* (Sw.) Schelpe & N.C. Anthony var. *involuta* WNE & KE 92/93  
*Cheilanthes involuta* (Sw.) Schelpe & N.C. Anthony var. *obscura* (N.C. Anthony) N.C. Anthony FH 475  
*Pellaea calomelanos* (Sw.) Link var. *calomelanos* KB *et al.* 7702

## AIZOACEAE

- Limeum viscosum* (Gay) Fenzl ssp. *viscosum* var. *kraussii* Friedr. KB 9160

## AMARANTHACEAE

- Kyphocarpa angustifolia* (Moq.) Lopr. KB 9155; KB *et al.* 7701

## ANACARDIACEAE

- Ozoroa* sp. nov. AL 166  
*Rhus pondoensis* Schönl. KB 9182; KB *et al.* 7687; AL 165; E. Masilo E 44; SDW 164  
*Rhus pyroides* Burch. var. *gracilis* (Engl.) Burt Davy KB 9154

## ANNONACEAE

- Annona senegalensis* Pers. ssp. *senegalensis* KC 20/01

## ASCLEPIADACEAE

- Aspidoglossum glabrescens* (Schltr.) Kupicha M. Stalmans 3017  
*Aspidoglossum interruptum* (E. Mey.) Bullock FH 385; AL 224  
*Pachycarpus asperifolius* Meisn. AL 272; SDW 155  
*Pachycarpus concolor* E. Mey. E. Masilo E 65  
*Pachycarpus scaber* (Harv.) N.E. Br. KB *et al.* 7717  
*Stenostelma corniculatum* (E. Mey.) Bullock KB *et al.* 7695; R. Kunitz & G. Otto 54  
*Asclepias adscendens* (Schltr.) Schltr. WNE & KE 92/97; R. Kunitz & G. Otto 57  
*Asclepias aurea* (Schltr.) Schltr. KB *et al.* 7714  
*Asclepias eminens* (Harv.) Schltr. KB *et al.* 7689; AL 288  
*Sisyranchus randii* S. Moore SDW 165  
*Brachystelma macropetalum* (Schltr.) N.E. Br. KB 9153  
*Ceropegia rendalii* N.E. Br. FH 501  
*Tenaris rubella* E. Mey. KB *et al.* 7683

## ASPARAGACEAE

- Asparagus setaceus* Kunth FH 773; AL 093

## ASPHODELACEAE

- Trachyandra reflexipilosa* (Kuntze) Oberm. FH 10  
*Chlorophytum aridum* Oberm. AL 193  
*Chlorophytum fasciculatum* (Baker) S. Kativu WNE & KE 92/71  
*Aloe* sp. prob. *A. minima* Baker FH 1391  
*Chortolirion angolense* (Baker) A. Berger FH 1360

## BORAGINACEAE

- Cynoglossum lanceolatum* Forssk. KC 20/04  
*Lithospermum* sp. near *L. cinereum* DC. E. Masilo E 51  
*Lithospermum officinale* L. KB *et al.* 7725

## CAMPANULACEAE

- Wahlenbergia undulata* (L. f.) A. DC. var. *undulata* KB 9168; FH 428  
*Wahlenbergia virgata* Engl. KB *et al.* 7636

## CARYOPHYLLACEAE

- Dianthus mooiensis* F.N. Williams ssp. *kirkii* (Burt Davy) Hooper KB *et al.* 7637

## CELASTRACEAE

- Maytenus heterophylla* (Eckl. & Zeyh.) N. Robson sens. lat. = *M. angularis* Sim KB 9177; KB *et al.* 7705; E. Masilo E 46; SDW 161

## COMMELINACEAE

- Commelina africana* L. var. *africana* AL 292

## COMPOSITAE/ASTERACEAE

- Vernonia hirsuta* (DC.) Sch. Bip. var. *hirsuta* E. Masilo E 70  
*Vernonia natalensis* Sch. Bip. ex Walp. GVC 133; WNE & KE 92/111  
*Vernonia steetziana* Oliv. & Hiern AL 104  
*Aster peglerae* Bolus E. Masilo E 72  
*Nidorella auriculata* DC. KB *et al.* 7696; WNE & KE 92/100; AL 180; AL 181  
*Helichrysum* sp. nov. cf. *H. confertifolium* Klatt FH 551  
*Helichrysum coriaceum* Harv. WNE & KE 92/108  
*Helichrysum nudifolium* (L.) Less. KB *et al.* 7711  
*Helichrysum oreophilum* Klatt FH 211  
*Helichrysum rosum* (Bergius) Less. AL *s.n.*  
*Athrixia phyllicoides* DC. KC 20/10  
*Pegolettia lanceolata* Harv. KB *et al.* 7691; GVC 134  
*Geigeria burkei* Harv. ssp. *burkei* var. *burkei* FH 1453; FH 253; FH 878  
*Geigeria burkei* Harv. ssp. *burkei* var. *elata* Merxm. KB *et al.* 7693; GVC 131; AL 099; E. Masilo E 68  
*Callilepis laureola* DC. KB *et al.* 7686  
*Acanthospermum glabratum* (DC.) Wild FH 955  
*Xanthium strumarium* L. KC 20/11  
*Zinnia peruviana* (L.) L. KC 20/12  
*Schistostephium rotundifolium* (DC.) Fenzl ex Harv. KC 20/13  
*Artemisia afra* Jacq. ex Willd. AL 102  
*Senecio coronatus* (Thunb.) Harv. WNE & KE 92/107  
*Senecio erubescens* Aiton var. *crepidifolius* DC. KB *et al.* 7716  
*Senecio gregatus* Hilliard FH 948  
*Senecio latifolius* DC. E. Masilo E 68  
*Senecio microglossus* DC. KB *et al.* 7647  
*Senecio serratuloides* DC. var. *serratuloides* AL 192  
*Senecio venosus* Harv. KB *et al.* 7646  
*Haplocarpha scaposa* Harv. E. Masilo E 74  
*Berkheya coddii* Roessler KB 9207; KB *et al.* 7710; GVC 126  
*Berkheya insignis* (Harv.) Thell. KB *et al.* 7639; E. Masilo E 59  
*Berkheya setifera* DC. I.H. Hartley 1303  
*Berkheya rehmannii* Thell. var. *rogersiana* Thell. FH 650  
*Dicoma anomala* Sond. FH 617  
*Dicoma swazilandica* S. Ortiz, Rodr. Oubiña & Pulgar AL 107  
*Dicoma zeyheri* Sond. ssp. *zeyheri* FH 572; FH 787; AL 110

## CONVOLVULACEAE

- Convolvulus sagittatus* Thunb. FH 1408  
*Xenostegia tridentata* (L.) D.F. Austin & Staples ssp. *angustifolia* (Jacq.) A. Meeuse WNE & KE 92/98

## CRASSULACEAE

- Kalanchoe paniculata* Harv. KB 9171  
*Crassula acinaciformis* Schinz KC 20/17

## CUCURBITACEAE

- Corallocarpus bainesii* (Hook. f.) A. Meeuse AL 226  
*Cucumis zeyheri* Sond. AL 227

## CYPERACEAE

- Cyperus obtusiflorus* Vahl var. *obtusiflorus* AL 301  
*Cyperus obtusiflorus* Vahl var. *sphaerocephalus* (Vahl) Kükenthal WNE & KE 92/109  
*Mariscus dregeanus* Kunth AL 216  
*Fuirena pubescens* (Poir.) Kunth WNE & KE 92/80  
*Bulbostylis oritrephes* (Ridl.) C.B. Clarke ssp. *australis* B.L. Burt AL 217  
*Abildgaardia ovata* (Burm. f.) Kral WNE & KE 92/82  
*Scleria bulbifera* Hochst. ex A. Rich. WNE & KE 92/101

## DIPSACACEAE

- Cephalaria petiolata* Compton KB 9185; FH 276  
*Scabiosa columbaria* L. KB *et al.* 7712; WNE & KE 92/113; AL 291

## EBENACEAE

- Euclea crispa* (Thunb.) Gürke ssp. *crispa* KC 20/15  
*Diospyros lycioides* Desf. ssp. *nitens* (Harv. ex Hiern) De Winter KB *et al.* 7723  
*Diospyros whyteana* (Hiern) F.B. White E. Masilo E 64

## ERICACEAE

- Erica drakensbergensis* Guthrie & Bolus AL 308

## EUPHORBIACEAE

- Securinega virosa* (Roxb. ex Willd.) Pax & K. Hoffm. KB *et al.* 7688  
*Phyllanthus maderaspatensis* L. KB 9178; KB *et al.* 7718; WNE & KE 92/102; AL 018; SDW 162  
*Acalypha angustata* Sond. var. *glabra* Sond. E. Masilo E 42  
*Acalypha peduncularis* E. Mey. ex Meisn. KB *et al.* 7707; SDW 156  
*Acalypha villicaulis* Hochst. WNE & KE 92/112  
*Acalypha wilmsii* Pax ex Prain & Hutch. E. Masilo E 71  
*Tragia rogersii* Prain WNE & KE 92/96  
*Jatropha latifolia* Pax var. *angustata* Prain E. Masilo E 63  
*Clutia pulchella* L. var. *pulchella* E. Masilo E 74a  
*Euphorbia pseudotuberosa* Pax FH 1438  
*Chamaesyce inaequilatera* (Sond.) Soják AL 023

## GENTIANACEAE

- Chironia purpurascens* (E. Mey.) Benth. & Hook. f. ssp. *purpurascens* R. Kunitz & G. Otto 55

## GERANIACEAE

- Monsonia transvaalensis* Knuth AL 21  
*Pelargonium luridum* (Andr.) Sweet E. Masilo E 43

## GRAMINEAE/POACEAE

- Imperata cylindrica* (L) Raeusch. WNE & KE 92/78; J. McDonald & R. Smit 46  
*Eulalia villosa* (Thunb.) Nees AL 130  
*Bothriochloa insculpta* (A. Rich.) A. Camus WNE & KE 92/81; AL 135  
*Schizachyrium sanguineum* (Retz.) Alston FH 578; AL 318  
*Andropogon eucomus* Nees L. Smook 8122  
*Andropogon schirensis* A. Rich. FH 207; FH 468; FH 876  
*Cymbopogon excavatus* (Hochst.) Stapf ex Burt Davy WNE & KE 92/79; AL 115; AL 310  
*Cymbopogon validus* (Stapf) Stapf ex Burt Davy AL 116  
*Cymbopogon* sp. cf. *C. marginatus* (Steud.) Stapf ex Burt Davy KC 20/14  
*Hyparrhenia filipendula* (Hochst.) Stapf var. *pilosa* (Hochst.) Stapf AL 316  
*Hyparrhenia newtonii* (Hack.) Stapf var. *newtonii* FH 340  
*Hyparrhenia rudis* Stapf FH 341  
*Hyperthelia dissoluta* (Nees ex Steud.) Clayton WNE & KE 92/88 (infl.); L. Smook 8105  
*Monocymbium ceresiiforme* (Nees) Stapf FH 395; AL 274  
*Trachypogon spicatus* (L. f.) Kuntze FH 449; AL 138  
*Heteropogon contortus* (L) Roem. & Schult. KB 9174; WNE & KE 92/75; L. Smook 8108  
*Diheteropogon amplexens* (Nees) Clayton FH 1606; AL 140  
*Themeda triandra* Forssk. WNE & KE 92/76; AL 141  
*Digitaria diagonalis* (Nees) Stapf var. *diagonalis* AL 142; AL 319  
*Brachiaria brizantha* (A. Rich.) Stapf WNE & KE 92/90; AL 126  
*Brachiaria serrata* (Thunb.) Stapf WNE & KE 92/103; WNE & KE 92/87  
*Panicum natalense* Hochst. FH 796  
*Setaria lindenbergiana* (Nees) Stapf WNE & KE 92/89  
*Setaria sphacelata* (Schumach.) Moss var. *sphacelata* AL 139  
*Tricholaena* sp. aff. *T. monachne* (Trin.) Stapf & C.E. Hubb. KB 9172; AL 317  
*Melinis nerviglumis* (Franch.) Zizka WNE & KE 92/73; AL 123  
*Melinis repens* (Willd.) Zizka ssp. *repens* FH 226; FH 412  
*Tristachya leucothrix* Nees WNE & KE 92/86  
*Loudetia flavida* (Stapf) C.E. Hubb FH 1596

- Loudetia simplex* (Nees) C.E. Hubb KB 9173; WNE & KE 92/85  
*Loudetia* sp. near *L. simplex* (Nees) C.E. Hubb. AL 110  
*Aristida canescens* Henr. ssp. *canescens* WNE & KE 92/72; AL 128; L. Smook 8118  
*Aristida congesta* Roem. & Schult. ssp. *barbicollis* (Trin. & Rupr.) De Winter AL 132; AL 292  
*Aristida diffusa* Trin. ssp. *burkei* (Stapf) Melderis FH 1420  
*Aristida transvaalensis* Henr. L. Smook 8119  
*Sartidia* sp. nov. KB 9167; AL 126  
*Sporobolus congoensis* Franch. I.H. Hartley 1312  
*Sporobolus sanguineus* Rendle L. Smook 8106  
*Sporobolus stapfianus* Gand. WNE & KE 92/77  
*Eragrostis capensis* (Thunb.) Trin. WNE & KE 92/84  
*Eragrostis chloromelas* Steud. AL 129  
*Eragrostis racemosa* (Thunb.) Steud. WNE & KE 92/83  
*Bewsia biflora* (Hack.) Gooss. AL 315

## GUTTIFERAE/CLUSIACEAE

- Hypericum aethiopicum* Thunb. ssp. *sonderi* (Bredell) N. Robson KB *et al.* 7645

## HYACINTHACEAE

- Dipcadi viride* (L.) Moench KB 9158

## HYPOXIDACEAE

- Hypoxis* sp. near *H. acuminata* Baker & *H. rigidula* Baker KB 9210; AL 145  
*Hypoxis iridifolia* Baker WNE & KE 92/95  
*Hypoxis rigidula* Baker var. *pilosissima* Baker E. Masilo E 58

## IRIDACEAE

- Gladiolus ecklonii* Lehm. FH 5; AL 1; AL 144

## LABIATAE/LAMIACEAE

- Tinnea galpinii* Briq. KB *et al.* 7682  
*Leonotis leonurus* (L.) R. Br. AL 201  
*Stachys natalensis* Hochst. var. *galpinii* (Briq.) Codd AL 081  
*Stachys natalensis* Hochst. var. *natalensis* KB 9176; KB *et al.* 7640; KB *et al.* 7709; GVC 127; AL 254; E. Masilo E 49  
*Hemizygia transvaalensis* (Schltr.) Ashby KB 9157; FH 1449  
*Ocimum* sp. near *O. obovatum* E. Mey. ex Benth. KB 9162  
*Ocimum obovatum* E. Mey. ex Benth. ssp. *obovatum* var. *galpinii* (Gürke) A.J. Paton KB *et al.* 7703  
*Ocimum* sp. nov. KB *et al.* 7706; SDW 160

## LEGUMINOSAE/FABACEAE (MIMOSOIDEAE)

- Acacia karoo* Hayne KC 20/20  
*Dichrostachys cinerea* (L.) Wight & Arn. ssp. *nyassana* (Taub.) Brenan KC 20/21

- Elephantorrhiza elephantina* (Burch.) Skeels KB 9209; KB *et al.* 7685
- LEGUMINOSAE/FABACEAE (CAESALPINIOIDEAE)  
*Chamaecrista comosa* E. Mey. var. *capricornia* (Steyaert) Lock AL 242  
*Peltophorum africanum* Sond. GVC 137
- LEGUMINOSAE/FABACEAE (PAPILIONOIDEAE)  
*Lotononis calycina* (E. Mey.) Benth. KB 9165; WNE & KE 92/94  
*Lotononis carinata* (E. Mey.) Benth. KB 9164; KB *et al.* 7638; E. Masilo E 55; SDW 163  
*Pearsonia aristata* (Schinz) Dummer E. Masilo E 76  
*Pearsonia sessilifolia* (Harv.) Dummer ssp. *marginata* (Schinz) Polhill KB *et al.* 7641; AL 230  
*Pearsonia sessilifolia* (Harv.) Dummer ssp. *sessilifolia* KB 9179  
*Crotalaria globifera* E. Mey. AL 244  
*Argyrolobium robustum* T.J. Edwards KB 9159; KB *et al.* 7648; AL 177  
*Indigofera dregeana* E. Mey. KB *et al.* 7684  
*Indigofera swaziensis* Bolus var. *swaziensis* AL 240  
*Tephrosia capensis* (Jacq.) Pers. var. *capensis* FH 612  
*Tephrosia elongata* E. Mey. var. *elongata* KB 9180  
*Stylosanthes fruticosa* (Retz.) Alston KB *et al.* 7697  
*Zornia capensis* Pers. KB *et al.* 7719  
*Dalbergia armata* E. Mey. E. Masilo E 56  
*Rhynchosia minima* (L.) DC. var. *prostrata* (Harv.) Meikle KB 9206  
*Rhynchosia monophylla* Schltr. GVC 142  
*Rhynchosia* sp. cf. *sordida* (E. Mey.) Schinz KB 9161; KB *et al.* 7681  
*Rhynchosia totta* (Thunb.) DC. var. *totta* AL 94  
*Rhynchosia totta* (Thunb.) DC. var. *graciliflora* Baker f. FH 465  
*Eriosema distinctum* N.E. Br. FH 473; FH 892; AL 53  
*Eriosema* sp. KB *et al.* 7722  
*Vigna unguiculata* (L.) Walp. ssp. *protracta* KB 9166
- LOBELIACEAE  
*Cyphia elata* Harv. var. *elata* FH 416; AL 171
- LYTHRACEAE  
*Nesaea schinzii* Koehne FH 1448
- MALPIGHIACEAE  
*Sphedamnocarpus pruriens* (Juss.) Szysz. ssp. *pruriens* AL 277
- MALVACEAE  
*Hibiscus aethiopicus* L. var. *ovatus* Harv. E. Masilo E 48  
*Hibiscus calyphyllus* Cav. E. Masilo E 62  
*Hibiscus trionum* L. AL 304
- MELASTOMATACEAE  
*Dissotis canescens* (E. Mey. ex R.A. Graham) Hook. f. glandular form WNE & KE 92/105
- MYRTACEAE  
*Heteropyxis canescens* Oliv. KB *et al.* 7721
- OCHNACEAE  
*Ochna natalitia* (Meisn.) Walp. KB *et al.* 7642; AL 299
- OLEACEAE  
*Jasminum quinatum* Schinz WNE & KE 92/110
- ORCHIDACEAE  
*Eulophia clavicornis* Lindl. var. *nutans* (Sond.) Hall WNE & KE 92/70
- PASSIFLORACEAE  
*Basananthe sandersonii* (Harv.) W.J. de Wilde KB *et al.* 7643
- PEDALIACEAE  
*Ceratotheca triloba* (Bernh.) Hook. f. FH 616; AL 038
- PERIPLOCACEAE  
*Raphionacme galpinii* Schltr. KB 9175  
*Raphionacme procumbens* Schltr. KB *et al.* 7694; R. Kunitz & G. Otto 56; E. Masilo E 66
- POLYGALACEAE  
*Polygala hottentotta* C. Presl KB 9186; GVC 129; AL 91  
*Polygala serpentaria* Eckl. & Zeyh. GVC 143
- PROTEACEAE  
*Faurea speciosa* (Welw.) Welw. WNE & KE 92/91  
*Protea gagedi* J.F. Gmel. KB 9208
- RANUNCULACEAE  
*Clematis brachiata* Thunb. AL 172
- ROSACEAE  
*Rubus rigidus* Sm. GVC 132; E. Masilo E 45
- RUBIACEAE  
*Cephalanthus natalensis* Oliv. KC 20/06  
*Pentanisia angustifolia* (Hochst.) Hochst. KB *et al.* 7704; KB *et al.* 7720; AL 077; E. Masilo E 75  
*Vangueria infausta* Burch. ssp. *infausta* KC 20/07  
*Pachystigma latifolium* Sond. KB 9181; KB *et al.* 7715; WNE & KE 92/106; AL 39; E. Masilo E 60  
*Pavetta edentula* Sond. KC 20/08  
*Anthospermum rigidum* Eckl. & Zeyh. ssp. *pumilum* (Sond.) Puff AL 13  
*Spermacoce natalensis* Hochst. KC 20/09

## SANTALACEAE

*Thesium exile* N.E. Br. KB *et al.* 7644

## SCROPHULARIACEAE

*Peliostomum leucorrhizum* E. Mey. ex Benth. AL 306

*Bowkeria cymosa* MacOwan KC 20/05

*Jamesbrittenia grandiflora* (Galpin) Hilliard AL 221

*Jamesbrittenia micrantha* (Klotzsch) Hilliard WNE & KE 92/99

*Alectra orobanchioides* Benth. AL 27

*Striga asiatica* (L.) Kuntze KB 9184; AL 280

*Striga bilabiata* (Thunb.) Kuntze KB *et al.* 7698; GVC 128; AL 62; AL 222

## SOLANACEAE

*Solanum tomentosum* L. E. Masilo E 41

## STERCULIACEAE

*Waltheria indica* L. E. Masilo E 47

## THUNBERGIACEAE

*Thunbergia atriplicifolia* E. Mey. ex Nees KB *et al.* 7700; AL 253

## THYMELAEACEAE

*Gnidia caffra* (Meisn.) Gilg I.H. Hartley 1295

*Gnidia capitata* L. f. KB *et al.* 7690; FH 665; AL 281

*Gnidia gymnostachya* (C.A. Mey.) Gilg KB 9183; KB *et al.* 7708; FH 274; FH 896; SDW 159

*Gnidia rubescens* Peterson KB 9169; GVC 130; WNE & KE 92/104; AL 169; E. Masilo E 54; M. Stalmans 2797

*Dais cotinifolia* L. E. Masilo E 61

## TILIACEAE

*Corchorus asplenifolius* Burch. KC 20/02

*Corchorus confusus* Wild KB 9170; KB *et al.* 7692; AL 300; E. Masilo E 53; SDW 157

*Plectranthus verticillatus* (L. f.) Druce KC 20/03

## UMBELLIFERAE/APIACEAE

*Alepidea setifera* N.E. Br. KB 9211; AL 196

*Heteromorpha involucrata* Conrath AL 197; E. Masilo E 73

*Pimpinella transvaalensis* H. Wolff FH 1410; AL 199

## VELLOZIACEAE

*Xerophyta villosa* (Baker) L.B. Sm. & Ayensu KB 9156

## VERBENACEAE

*Lippia javanica* (Burm. f.) Spreng. AL 91

## VITACEAE

*Cyphostemma humile* (N.E. Br.) Desc. ex Wild & Drumm. ssp. *dolichopus* (C.A. Sm.) Wild KB *et al.* 7649
